# Supplementary material for: Service Use in the Month and Year Prior to Suicide Among Adults Enrolled in Ohio Medicaid
Source: Atypon-hosted journal article supplement (doi:10.1176/appi.ps.201600206), 2017-02-15
Supplement: appi.ps.201600206.ds001.pdf [file appi.ps.201600206.ds001.pdf]

Characteristics of suicide decedents receiving any health care visits within a year of suicide

| Characteristic        | Visit within<br>1 year<br>(N=1107) |    | No Visit within<br>1 year<br>(N=231) |    | p <sup>a</sup> |
|-----------------------|------------------------------------|----|--------------------------------------|----|----------------|
|                       | N                                  | %  | N                                    | %  |                |
| Age                   |                                    |    |                                      |    | .08            |
| 19–29                 | 247                                | 22 | 67                                   | 29 |                |
| 30–49                 | 572                                | 52 | 112                                  | 48 |                |
| 50–65                 | 288                                | 26 | 52                                   | 23 |                |
| Sex                   |                                    |    |                                      |    | <.001          |
| Male                  | 688                                | 62 | 174                                  | 75 |                |
| Female                | 419                                | 38 | 57                                   | 25 |                |
| Race-ethnicity        |                                    |    |                                      |    | .63            |
| White, non-Hispanic   | 962                                | 87 | 198                                  | 86 |                |
| Other                 | 145                                | 13 | 33                                   | 14 |                |
| Medicaid eligibility  |                                    |    |                                      |    | <.001          |
| Disability            | 653                                | 59 | 58                                   | 25 |                |
| Other                 | 454                                | 41 | 173                                  | 75 |                |
| Residence             |                                    |    |                                      |    | .01            |
| Urban                 | 812                                | 73 | 188                                  | 81 |                |
| Rural                 | 295                                | 27 | 43                                   | 19 |                |
| Continuous enrollment |                                    |    |                                      |    | <.001          |
| Yes                   | 685                                | 62 | 56                                   | 24 |                |
| No                    | 422                                | 38 | 175                                  | 76 |                |

<sup>a</sup>Based on chi-square statistics
